# Supplementary material
Source: PubMed Central journal article supplement (PMC7263457)
Supplement: ehp6012.s001.acco.pdf [file ehp6012.s001.acco.pdf]

**Note to readers with disabilities:** *EHP* strives to ensure that all journal content is accessible to all readers. However, some figures and Supplemental Material published in *EHP* articles may not conform to [508 standards](#) due to the complexity of the information being presented. If you need assistance accessing journal content, please contact [ehp508@niehs.nih.gov](mailto:ehp508@niehs.nih.gov). Our staff will work with you to assess and meet your accessibility needs within 3 working days.

### **Supplemental Material**

#### **Exposure to Drinking Water Chlorination by-Products and Fetal Growth and Prematurity: A Nationwide Register-Based Prospective Study**

Melle Säve-Söderbergh, Jonas Toljander, Carolina Donat-Vargas, Marika Berglund, and  
Agneta Åkesson

#### **Table of Contents**

**Table S1.** Associations between average trihalomethane (TTHM) exposure (2<sup>nd</sup> trimester) for full-term small for gestational age expressed as odds ratios (OR) and 95% confidence interval (CI).

Supplementary Table S1 Associations between average trihalomethane (TTHM) exposure (2<sup>nd</sup> trimester) for full-term small for gestational age expressed as odds ratios (OR) and 95% confidence interval (CI).

| Treatment                    |               | Total births | No chlorine<br>OR | <5 µg TTHM/l<br>OR (95% CI) | 5-15 µg TTHM/l<br>OR (95% CI) | >15 µg TTHM/l<br>OR (95% CI) | p-trend |
|------------------------------|---------------|--------------|-------------------|-----------------------------|-------------------------------|------------------------------|---------|
| All chlorination treatments* | Cases (n)     | 522,116      | 1,100             | 4,756                       | 2,841                         | 1,593                        |         |
|                              | Non-cases (n) |              | 61,404            | 244,941                     | 129,255                       | 76,226                       |         |
|                              | Crude         |              | 1.00 (ref)        | 1.08 (1.01-1.16)            | 1.23 (1.14-1.32)              | 1.17 (1.08-1.26)             | <0.001  |
|                              | Model 1       |              | 1.00 (ref)        | 1.01 (0.93-1.09)            | 1.17 (1.07-1.27)              | 1.10 (1.00-1.21)             | <0.001  |
|                              | Model 2       |              | 1.00 (ref)        | 0.95 (0.87-1.03)            | 1.09 (0.99-1.19)              | 1.02 (0.92-1.12)             | 0.2     |
| Chloramine                   | Cases (n)     | 276,834      | 1,100             | 3,152                       | 269                           | 682                          |         |
|                              | Non-cases (n) | 276,834      | 61,404            | 166,831                     | 14,268                        | 34,128                       |         |
|                              | Model 1       |              | 1.00 (ref)        | 1.02 (0.93-1.11)            | 0.99 (0.85-1.15)              | 1.02 (0.91-1.15)             | 0.8     |
|                              | Model 2       |              | 1.00 (ref)        | 0.91 (0.83-1.00)            | 0.89 (0.75-1.04)              | 0.91 (0.81-1.03)             | 0.3     |
|                              | Model 2       |              |                   | 1.00 (ref)                  | 0.96 (0.83-1.12)              | 0.99 (0.89-1.10)             | 0.9     |
| Hypochlorite                 | Cases (n)     | 157,514      | 1,100             | 582                         | 580                           | 881                          |         |
|                              | Non-cases (n) | 157,514      | 61,404            | 25,702                      | 26,678                        | 40,587                       |         |
|                              | Model 1       |              | 1.00 (ref)        | 1.14 (1.02-1.27)            | 1.16 (1.04-1.30)              | 1.16 (1.05-1.28)             | 0.005   |
|                              | Model 2       |              | 1.00 (ref)        | 1.10 (0.97-1.24)            | 1.16 (1.03-1.30)              | 1.15 (1.03-1.28)             | 0.009   |
|                              | Model 2       |              |                   | 1.00 (ref)                  | 1.11 (0.99-1.25)              | 1.09 (0.98-1.22)             | 0.8     |

\* Chloramine, hypochlorite, chlorine gas, chlorine dioxide in single or combined treatment

Model 1: adjusted for maternal age, BMI, household income, attained education, smoking at week 30 and country of birth by inverse probability weighting<sup>3,3</sup>

Model 2: model 1 additionally adjusted for previous miscarriages, parity, sick leave/early retirement, use of teratogenic drugs, diabetes, preeclampsia, hypertension, weight gain and year of birth.

p-trend: linear trends across categories were tested using the median TTHM concentration within categories as a continuous variable
