# Supplementary material
Source: PubMed Central journal article supplement (PMC7263457)
Supplement: ehp6012.smcontents.508.pdf [file ehp6012.smcontents.508.pdf]

**Note to readers with disabilities:** *EHP* strives to ensure that all journal content is accessible to all readers. However, some figures and Supplemental Material published in *EHP* articles may not conform to [508 standards](#) due to the complexity of the information being presented. If you need assistance accessing journal content, please contact [ehp508@niehs.nih.gov](mailto:ehp508@niehs.nih.gov). Our staff will work with you to assess and meet your accessibility needs within 3 working days.

### **Supplemental Material**

#### **Exposure to Drinking Water Chlorination by-Products and Fetal Growth and Prematurity: A Nationwide Register-Based Prospective Study**

Melle Säve-Söderbergh, Jonas Toljander, Carolina Donat-Vargas, Marika Berglund, and  
Agneta Åkesson

#### **Table of Contents**

**Table S1.** Associations between average trihalomethane (TTHM) exposure (2<sup>nd</sup> trimester) for full-term small for gestational age expressed as odds ratios (OR) and 95% confidence interval (CI).
